# Supplementary material
Source: Springer Nature journal article supplement (https://www.springermedizin.de/resource/supplementary/12936_2005_178_MOESM4_ESM.pdf/9547064)

**A**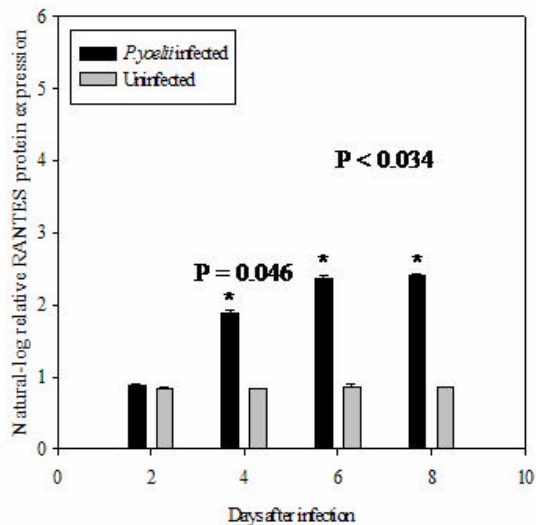**B**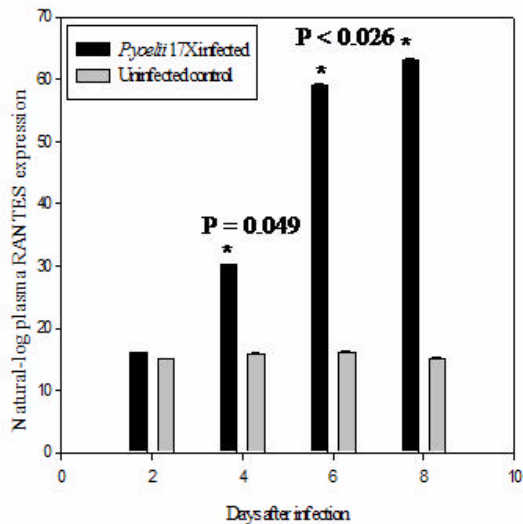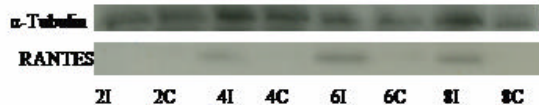

Supplement: MOESM4 [file 9547064]
